# Supplementary material for: 2mit, an Intronic Gene of Drosophila melanogaster timeless2, Is Involved in Behavioral Plasticity
Source: PLoS One. 2013 Sep 30;8(9):e76351. doi: 10.1371/journal.pone.0076351 (PMC3786989; doi:10.1371/journal.pone.0076351)
Supplement: Table S2 — Primers used in amplification and cloning experiments. (XLS) [file pone.0076351.s006.xls]

## Sheet: Foglio1
Supplementary Table 2. Primers used in amplification and cloning experiments
Gene	Reference sequence	Experiment type	primer	position	Sequence	Restriction site
2mit	NM_142001	2mitO contruct generation	2mitN1F	1297-1316	5’-AAGCGGCCGCATGGTGAAAATCGTGAACCA-3’	NotI
			2mitB1R	2065-2088	5'-AATTCCTTGCAGAGCACGAATAGC-3'	-
			2mitB1F	2057-2098	5'-GTGGATCCGCTATTCGTGCTCTGCAAGGTATTCCGGATTTGG-3'	BamHI
			2mitS1R	3089-3112	5'-GTGTTGCTGTGGTGTCGCTTGATG-3'	-
			2mitS1F	2969-2992	5'-CAGTGGAAGTAGCAGCGGCAACAG-3'	-
			2mitN1R	3991-4014	5'-TAGCTCCACATATGCTTTAAGCTG-3'	NdeI
			2mitN1F	3991-4014	5'-CAGCTTAAAGCATATGTGGAGCTA-3'	NdeI
			2mitXHAR	4700-4720	5’-GGCTCGAGTCAGGCGTAATCGGGCACATCGTAGGGGTACCAGATGTTCAGCCTCCGCG-3'	XhoI
		2mit KD contruct generation	2mitKDF	2756-2783	5'-GTGTAAGTGGGCGCGTGGATTTGAAGAC-3'	-
			2mitKDR	3970-3989	5'-GCAAAGGTGCTCAACTCCTC-3'	-
		2mit QPCR	2mit_1F	1664-1683	5’-TCACCGCCATGGATCTGAGC-3’	-
			2mit_1R	1861-1881	5’-CAACTGAGGCAATCGCTGGGC-3’	-
tim2	FBgn0038118	tim2 QPCR	RTexon17_F	73590-73604	5'-ATCGCATTGAGCCGGACTGC-3'	-
	FBgn0038118		RTexon18_R	73906-73925	5'-CGCCCTCGCCTTCCATTTCT-3'	-
CG34308	FBgn0038118	CG34308 QPCR	RTCG34308_F	1145-1164	5'-CCATAGTGCGCATTTTCCTT-3'	-
			RTCG34308_R	1277-1296	5'-GTGGAGATTTGTTGGGTGCT-3'	-
BK002510	FBgn0038118 3R:8914373-8989598	BK002510 QPCR	BK002510_F	3099-3118	5'-ACGAGGATTTTTCCGCTTCT-3'	-
			BK002510_R	3632-3651	5'-ATGGACACCCACTTCCACTC-3'	-
AY118619	FBgn0038118 3R:8914373-8989598	AY118619 QPCR	AY118619_1F	66954-66973	5'-AAAAACCAAGTGCCAAGTGC-3'	-
			AY118619_2f	65798-65817	5'-ACAACTCCCCCTCGAATAGG-3'	-
			AY118619_3f	44284-44303	5'-TCGAGTTGAGTTGCGTTTTG-3'	-
			AY118619_3R	44136-44155	5'-GGGTCGACGTCGTCTGTTAT-3'	-
rp49	U92431	QPCR	Rp49_169	169-188	5'-ATCGGTTACGGATCGAACAA-3'	-
			Rp49_333	314-333	5'-GACAATCTCCTTGCGCTTCT-3'	-
tim2	FBgn0038118	PiggyBac detection in c03963	tF	63597-63616	5'-TTAACAAACATGCGGAGTGC-3'	-
			tR	64240-64259	5'-CCGAAAAGCCATAAAGTCCA-3'	-
tim1	U37018	ls-s polimorphysm determination	5’TIM-GA	311-330	5’-TGGAATAATCAGAACTTTGA-3’
			5’TIM-AT	311-330	5’-TGGAATAATCAGAACTTTAT-3’
			3’TIM	923-942	5’-AGATTCCACAAGATCGTGTT-3’
			FTIM	2438-2457	5’-CATTCATTCCAAGCAGTATC-3’
			RTIM	2786-2805	5’-TATTCATGAACTTGTGAATC-3’
underlined sequenced indicate restriction enzymes sites
bold sequence represents the HA coding fragment
